# Supplementary material for: Modelling Holocene peatland dynamics with an individual-based dynamic vegetation model
Source: Copernicus journal article supplement (doi:10.5194/bg-14-2571-2017), 2017-05-19
Supplement: Supplementary file 1 [file bg-14-2571-2017-supplement.pdf]

Supplement of Biogeosciences, 14, 2571–2596, 2017  
<http://www.biogeosciences.net/14/2571/2017/>  
doi:10.5194/bg-14-2571-2017-supplement  
© Author(s) 2017. CC Attribution 3.0 License.

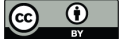

Biogeosciences  Open Access

*Supplement of*

## **Modelling Holocene peatland dynamics with an individual-based dynamic vegetation model**

**Nitin Chaudhary et al.**

*Correspondence to:* Nitin Chaudhary (nitin.chj@gmail.com)

The copyright of individual parts of the supplement might differ from the CC-BY 3.0 licence.
